# Supplementary material
Source: Springer Nature journal article supplement (https://www.springermedizin.de/resource/supplementary/13023_2013_655_MOESM2_ESM.pdf/9642616)
Supplement: MOESM2 [file 9642616]

Corticosteroids (n=25)

n=7

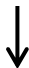

Complete  
recovery

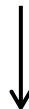

Stop corticosteroids

n=5

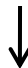

Satisfactory  
outcome

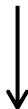

Continuation of the  
corticosteroids

n=13

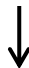

Unsatisfactory outcome:  
cortico-dependance  
or resistance

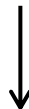

Immunosuppressants
